# Supplementary material for: Restoring Mitochondrial Quantity and Quality to Reverse Warburg Effect and Drive Tumor Differentiation
Source: PubMed Central journal article supplement (PMC11661309; doi:10.21203/rs.3.rs-5494402/v1), 2024-12-13
Supplement: NIHPPRS5494402v1-supplement-1.pdf [file NIHPPRS5494402v1-supplement-1.pdf]

## Supplementary Files

This is a list of supplementary files associated with this preprint. Click to download.

- [FigureS1.png](#)
- [FigureS2.png](#)
- [FigureS3.png](#)
- [FigureS4.png](#)
- [FigureS5.png](#)
- [FigureS6.png](#)
- [Graphicsabstract.png](#)
- [SupplementalVideo1.pptx](#)
